# Supplementary material for: Long-Term Soft-Food Rearing in Young Mice Alters Brain Function and Mood-Related Behavior
Source: MDPI journal article supplement (doi:10.3390/nu15102397), 2023-05-20
Supplement: s1 [file s1]

Supplementary Materials

## Long-term Soft-food Rearing in Young Mice Alters Brain Function and Mood-related Behavior

Masae Furukawa <sup>1,\*</sup>, Hirobumi Tada <sup>2,3</sup>, Resmi Raju <sup>1</sup>, Jingshu Wang <sup>1</sup>, Haruna Yokoi <sup>1</sup>, Mitsuyoshi Yamada <sup>1,4</sup>, Yosuke Shikama <sup>1</sup> and Kenji Matsushita <sup>1,\*</sup>

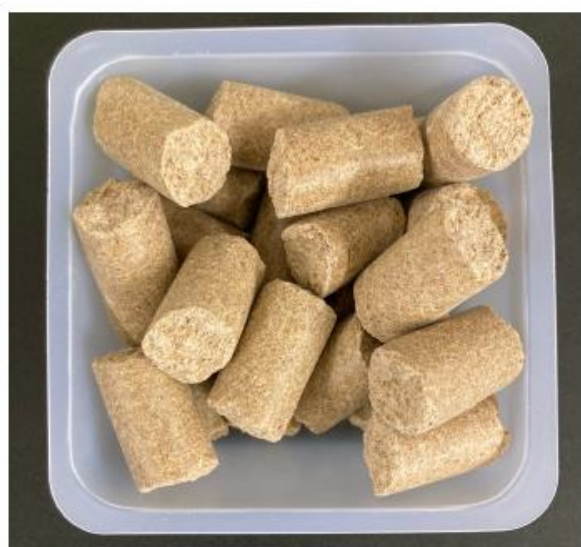

**Solid diet**

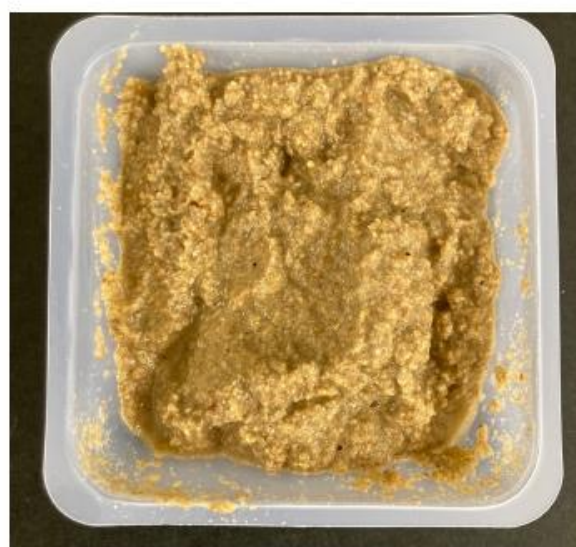

**Soft diet**

**Figure S1.** Representative images of the standard pellets and the powder provided as hard and soft diet, respectively, to the experimental animals in each group.
